# Supplementary material for: Risk Factors for Severe Hypotension with 5-ALA Photodynamic Diagnosis in TURBT Patients
Source: Research Square preprint supplement (doi:10.21203/rs.3.rs-8487743/v1), 2026-01-23
Supplement: Supplementary file 1 [file ab162e0a3273d4166d17c646.xlsx]

## Sheet: Table 1
Table 1. Baseline characteristics (N = 418 procedures)
Characteristic	Overall
Age, years	73 (68 to 80); range 26 to 92
Age at least 80 years, n (%)	112 (26.8%)
Male sex, n (%)	332 (79.4%)
Body mass index, kg/m^2	23.2 (20.7 to 25.6); range 14.5 to 37.2
Body mass index at least 30 kg/m^2, n (%)	11 (2.6%)
Estimated glomerular filtration rate, mL/min/1.73 m^2	63.0 (50.4 to 73.4); range 6.3 to 113.4
eGFR less than 60 mL/min/1.73 m^2, n (%)	173 (41.4%)
Cardiovascular comorbidity, n (%)	37 (8.9%)
Diabetes mellitus, n (%)	74 (17.7%)
Any antihypertensive medication, n (%)	190 (45.5%)
Renin angiotensin system inhibitor use, n (%)	108 (25.8%)
Calcium channel blocker use, n (%)	145 (34.7%)
Anesthesia type, general anesthesia, n (%)	167 (40.0%)
Anesthesia type, spinal anesthesia, n (%)	250 (59.8%)
Anesthesia type, not applicable, n (%)	1 (0.2%)
Note: Procedures corresponded to 332 unique patients.
Continuous variables are shown as median (interquartile range) with range. Categorical variables are shown as n (%).
Not applicable indicates a procedure canceled before anesthesia induction (n=1).

## Sheet: Table 2
Perioperative adverse event incidence (N = 418 procedures)
Outcome	n/N	Incidence	95% CI
Intraoperative hypotension (any)	317/418	0.758	71.5% to 79.7%
Severe hypotension (primary outcome)	15/418	0.036	2.2% to 5.8%
Postoperative ICU admission (overall)	6/418	0.014	0.7% to 3.1%
Postoperative ICU admission among severe hypotension	5/15	0.333	15.2% to 58.3%
Cardiology evaluation or intervention among severe hypotension	12/15	0.8	54.8% to 93.0%
Photosensitivity reactions	17/418	0.041	2.6% to 6.4%
Postoperative liver enzyme elevation	1/418	0.002	0.0% to 1.3%
Notes: Incidence is reported as percent. Confidence intervals are Wilson 95% confidence intervals. ICU and cardiology rows are conditional on severe hypotension.

## Sheet: Table 3
Table 3. Risk factors for severe hypotension (univariate and primary multivariable model)
Risk factor	Univariate OR (95% CI)	p value	Adjusted OR (95% CI)	p value (adj)
Patient characteristics / comorbidities
Age at least 80 years	4.37 (1.38 to 13.85)	0.012	4.73 (1.13 to 19.87)	0.034
Body mass index at least 30 kg/m^2	12.34 (2.00 to 76.37)	0.007	15.56 (2.09 to 116.03)	0.007
eGFR less than 60 mL/min/1.73 m^2	6.01 (1.63 to 22.23)	0.007	3.33 (0.72 to 15.48)	0.124
Male sex	0.50 (0.16 to 1.58)	0.239	—	—
Cardiovascular disease	2.71 (0.70 to 10.53)	0.149	—	—
Diabetes mellitus	0.71 (0.15 to 3.32)	0.66	—	—
Medications
Any antihypertensive medication use	1.39 (0.46 to 4.14)	0.557	—	—
Renin angiotensin system inhibitor use	1.46 (0.42 to 5.02)	0.551	—	—
Calcium channel blocker use	0.68 (0.20 to 2.24)	0.521	—	—
Anesthesia
General anesthesia (vs spinal)	0.58 (0.17 to 1.97)	0.384	—	—
Adjusted model includes age at least 80 years, body mass index at least 30 kg/m^2, and eGFR less than 60 mL/min/1.73 m^2. Odds ratios use cluster-robust standard errors clustered by patient.

## Sheet: Table 4
Table 4. Observed risk of severe hypotension by triage score
Score	N	Events	Risk (%)	95% CI (%)
0	201	0	0	0.00 to 1.88
1	139	7	5.04	2.46 to 10.03
2	77	7	9.09	4.47 to 17.60
3	1	1	100	20.65 to 100.00
Exact risk is events divided by N in each score. 95% CIs are Wilson intervals.
